# Supplementary material for: Comparative Phylogeography and Phylogeny of Pennah Croakers (Teleostei: Sciaenidae) in Southeast Asian Waters
Source: MDPI journal article supplement (doi:10.3390/genes12121926), 2021-11-29
Supplement: s1 [file s1]

Table S1. Sample size by species and locality. Species arranged by alphabetical order; localities arranged from West to East. Two lineages were recognized within *P. anea*, and coined lineage L1 and lineage L2. Colours represent the nine populations considered in this paper (see Figure 1a). Kota Kinabalu, Tawau and Singapore were omitted for population consideration due to too low number of samples per site. *N* is number of samples.

| Species/Lineage         | Sampling locality    |             |             |   |    |   |             |                 |    |             |    |    |             |    |    |    |             |    |    |             |             |             |    |    | <i>N</i> |
|-------------------------|----------------------|-------------|-------------|---|----|---|-------------|-----------------|----|-------------|----|----|-------------|----|----|----|-------------|----|----|-------------|-------------|-------------|----|----|----------|
|                         | Eastern Indian Ocean |             |             |   |    |   |             | South China Sea |    |             |    |    |             |    |    |    |             |    |    |             |             |             |    |    |          |
|                         | 1                    | 2           | 3           | 4 | 5  | 6 | 7           | 8               | 9  | 10          | 11 | 12 | 13          | 14 | 15 | 16 | 17          | 18 | 19 | 20          | 21          | 22          | 23 | 24 |          |
|                         | <div></div>          | <div></div> | <div></div> |   |    |   | <div></div> | <div></div>     |    | <div></div> |    |    | <div></div> |    |    |    | <div></div> |    |    | <div></div> | <div></div> | <div></div> |    |    |          |
| <i>P. anea</i> L1       |                      | 16          | 9           | 1 |    | 1 | 9           |                 |    |             |    |    |             |    |    |    |             |    |    |             |             |             |    |    | 36       |
| <i>P. anea</i> L2       |                      |             | 24          | 8 |    | 4 | 19          | 2               | 10 | 13          | 7  | 1  | 1           | 19 | 1  | 2  |             | 5  |    |             |             |             |    |    | 116      |
| <i>P. macrocephalus</i> |                      |             |             |   |    |   |             |                 |    | 2           | 8  |    |             | 14 |    |    | 19          | 15 | 1  | 7           | 4           | 19          | 14 | 8  | 111      |
| <i>P. ovata</i>         | 12                   |             | 14          | 3 | 22 | 2 |             |                 |    |             |    |    |             |    |    |    |             |    |    |             |             |             |    |    | 53       |

1. Riaz, Uddin, Chittagong; 2. Ranong; 3. Kuala Perlis; 4. Penang; 5. Bagan Panchor, Perak; 6. Lumut, Perak; 7. Selangor; 8. Pran Buri; 9. Klong Wan; 10. Kota Bharu, Kelantan; 11. Pulau Kambing, Terengganu; 12. Singapore; 13. QuangYen Town, Vietnam; 14. Hainan; 15. Kota Kinabalu, Sabah; 16. Tawau, Sabah; 17. Penghu; 18. Wuchi, Taiwan; 19. Yunlin, Taiwan; 20. Chaiyi, Taiwan; 21. Anping, Taiwan; 22. Pingtung, Taiwan; 23. Ilan, Taiwan; 24. Taitung, Taiwan

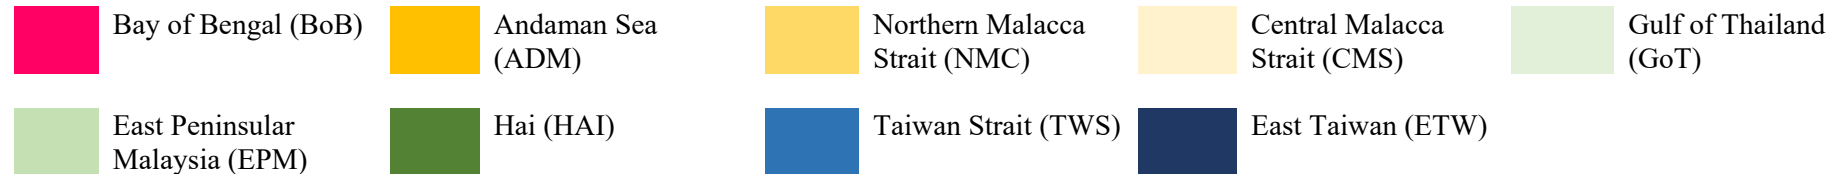

Table S2. Taxa, gene, voucher number, GenBank accession number and the sample localities of representative species. In parenthesis is their assigned population. Samples ID of *P. anea* lineage L1 are written in *Italic*.

| Species              | Sample ID | Voucher No. | Sample site                          | GenBank Accession Number |          |          |
|----------------------|-----------|-------------|--------------------------------------|--------------------------|----------|----------|
|                      |           |             |                                      | Cyt <i>b</i>             | COI      | RAG1     |
| <i>Pennahia anea</i> | WJC7637   | NTUM16446   | Ranong, Thailand (ADM)               | MN746952                 | -        | -        |
|                      | WJC7638   | -           | Ranong, Thailand (ADM)               | MN746953                 | -        | -        |
|                      | WJC7639   | -           | Ranong, Thailand (ADM)               | MN746954                 | -        | -        |
|                      | WJC7640   | -           | Ranong, Thailand (ADM)               | MN746955                 | -        | -        |
|                      | WJC7641   | -           | Ranong, Thailand (ADM)               | MN746956                 | -        | -        |
|                      | WJC7642   | -           | Ranong, Thailand (ADM)               | MN746957                 | -        | -        |
|                      | WJC7643   | -           | Ranong, Thailand (ADM)               | MN746958                 | -        | -        |
|                      | WJC7644   | -           | Ranong, Thailand (ADM)               | MN746959                 | -        | -        |
|                      | WJC7645   | -           | Ranong, Thailand (ADM)               | MN746960                 | -        | -        |
|                      | WJC7646   | -           | Ranong, Thailand (ADM)               | MN746961                 | -        | -        |
|                      | WJC7647   | -           | Ranong, Thailand (ADM)               | MN746962                 | -        | -        |
|                      | WJC7648   | -           | Ranong, Thailand (ADM)               | MN746963                 | -        | -        |
|                      | WJC7649   | -           | Ranong, Thailand (ADM)               | MN746964                 | -        | -        |
|                      | WJC7650   | -           | Ranong, Thailand (ADM)               | MN746965                 | -        | -        |
|                      | WJC7651   | -           | Ranong, Thailand (ADM)               | MN746966                 | MT778775 | MT778779 |
|                      | WJC7775   | NTUM16446   | Ranong, Thailand (ADM)               | MN746969                 | -        | -        |
|                      | May128    | -           | Kuala Perlis, Perlis, Malaysia (NMS) | MN746835                 | -        | -        |
|                      | May133    | -           | Kuala Perlis, Perlis, Malaysia (NMS) | MN746840                 | MT778776 | MT778780 |
|                      | May140    | -           | Kuala Perlis, Perlis, Malaysia (NMS) | MN746846                 | -        | -        |
|                      | May146    | -           | Kuala Perlis, Perlis, Malaysia (NMS) | MN746850                 | -        | -        |
|                      | May149    | -           | Kuala Perlis, Perlis, Malaysia (NMS) | MN746852                 | -        | -        |
|                      | May154    | -           | Kuala Perlis, Perlis, Malaysia (NMS) | MN746856                 | -        | -        |
|                      | May156    | -           | Kuala Perlis, Perlis, Malaysia (NMS) | MN746858                 | -        | -        |
|                      | May158    | -           | Kuala Perlis, Perlis, Malaysia (NMS) | MN746860                 | -        | -        |
|                      | May159    | -           | Kuala Perlis, Perlis, Malaysia (NMS) | MN746861                 | -        | -        |
|                      | May169    | -           | Penang, Malaysia (NMS)               | MN746868                 | -        | -        |
|                      | May101    | -           | Lumut, Perak, Malaysia (NMS)         | MN746828                 | -        | -        |

| Species | Sample ID | Voucher No. | Sample site                          | GenBank Accession Number |            |             |
|---------|-----------|-------------|--------------------------------------|--------------------------|------------|-------------|
|         |           |             |                                      | Cyt <i>b</i>             | <i>COI</i> | <i>RAG1</i> |
|         | May576    | -           | Selangor, Malaysia (CMS)             | MN746914                 | -          | -           |
|         | May577    | -           | Selangor, Malaysia (CMS)             | MN746915                 | -          | -           |
|         | May580    | -           | Selangor, Malaysia (CMS)             | MN746916                 | MT778777   | MT778781    |
|         | May418    | -           | Selangor, Malaysia (CMS)             | MN746883                 | -          | -           |
|         | May420    | -           | Selangor, Malaysia (CMS)             | MN746885                 | -          | -           |
|         | May429    | -           | Selangor, Malaysia (CMS)             | MN746893                 | -          | -           |
|         | May431    | -           | Selangor, Malaysia (CMS)             | MN746895                 | -          | -           |
|         | May434    | -           | Selangor, Malaysia (CMS)             | MN746898                 | -          | -           |
|         | May435    | -           | Selangor, Malaysia (CMS)             | MN746899                 | -          | -           |
|         | May070    | -           | Kuala Perlis, Perlis, Malaysia (NMS) | MN746827                 | -          | -           |
|         | May126    | -           | Kuala Perlis, Perlis, Malaysia (NMS) | MN746833                 | KX778049   | KX777828    |
|         | May127    | -           | Kuala Perlis, Perlis, Malaysia (NMS) | MN746834                 | -          | -           |
|         | May129    | -           | Kuala Perlis, Perlis, Malaysia (NMS) | MN746836                 | -          | -           |
|         | May130    | -           | Kuala Perlis, Perlis, Malaysia (NMS) | MN746837                 | -          | -           |
|         | May131    | -           | Kuala Perlis, Perlis, Malaysia (NMS) | MN746838                 | -          | -           |
|         | May132    | -           | Kuala Perlis, Perlis, Malaysia (NMS) | MN746839                 | -          | -           |
|         | May135    | -           | Kuala Perlis, Perlis, Malaysia (NMS) | MN746841                 | -          | -           |
|         | May136    | -           | Kuala Perlis, Perlis, Malaysia (NMS) | MN746842                 | -          | -           |
|         | May137    | -           | Kuala Perlis, Perlis, Malaysia (NMS) | MN746843                 | -          | -           |
|         | May138    | -           | Kuala Perlis, Perlis, Malaysia (NMS) | MN746844                 | -          | -           |
|         | May139    | -           | Kuala Perlis, Perlis, Malaysia (NMS) | MN746845                 | -          | -           |
|         | May143    | -           | Kuala Perlis, Perlis, Malaysia (NMS) | MN746847                 | -          | -           |
|         | May144    | -           | Kuala Perlis, Perlis, Malaysia (NMS) | MN746848                 | -          | -           |
|         | May145    | -           | Kuala Perlis, Perlis, Malaysia (NMS) | MN746849                 | -          | -           |
|         | May147    | -           | Kuala Perlis, Perlis, Malaysia (NMS) | MN746851                 | -          | -           |
|         | May150    | -           | Kuala Perlis, Perlis, Malaysia (NMS) | MN746853                 | -          | -           |
|         | May151    | -           | Kuala Perlis, Perlis, Malaysia (NMS) | MN746854                 | -          | -           |
|         | May153    | -           | Kuala Perlis, Perlis, Malaysia (NMS) | MN746855                 | -          | -           |
|         | May155    | -           | Kuala Perlis, Perlis, Malaysia (NMS) | MN746857                 | -          | -           |
|         | May157    | -           | Kuala Perlis, Perlis, Malaysia (NMS) | MN746859                 | -          | -           |

| Species | Sample ID | Voucher No. | Sample site                          | GenBank Accession Number |            |             |
|---------|-----------|-------------|--------------------------------------|--------------------------|------------|-------------|
|         |           |             |                                      | <i>Cyt b</i>             | <i>COI</i> | <i>RAG1</i> |
|         | May161    | -           | Kuala Perlis, Perlis, Malaysia (NMS) | MN746862                 | -          | -           |
|         | May163    | -           | Kuala Perlis, Perlis, Malaysia (NMS) | MN746863                 | -          | -           |
|         | May164    | -           | Kuala Perlis, Perlis, Malaysia (NMS) | MN746864                 | -          | -           |
|         | May166    | -           | Penang, Malaysia (NMS)               | MN746865                 | -          | -           |
|         | May167    | -           | Penang, Malaysia (NMS)               | MN746866                 | -          | -           |
|         | May168    | -           | Penang, Malaysia (NMS)               | MN746867                 | -          | -           |
|         | May170    | -           | Penang, Malaysia (NMS)               | MN746869                 | -          | -           |
|         | May787    | -           | Penang, Malaysia (NMS)               | MN746918                 | -          | -           |
|         | May788    | -           | Penang, Malaysia (NMS)               | MN746919                 | -          | -           |
|         | May789    | -           | Penang, Malaysia (NMS)               | MN746920                 | -          | -           |
|         | May790    | -           | Penang, Malaysia (NMS)               | MN746921                 | -          | -           |
|         | May102    | -           | Lumut, Perak, Malaysia (NMS)         | MN746829                 | -          | -           |
|         | May103    | -           | Lumut, Perak, Malaysia (NMS)         | MN746831                 | -          | -           |
|         | May104    | -           | Lumut, Perak, Malaysia (NMS)         | MN746830                 | -          | -           |
|         | May105    | -           | Lumut, Perak, Malaysia (NMS)         | MN746832                 | KX778048   | KX777827    |
|         | May568    | -           | Selangor, Malaysia (CMS)             | MN746907                 | -          | -           |
|         | May569    | -           | Selangor, Malaysia (CMS)             | MN746908                 | -          | -           |
|         | May570    | -           | Selangor, Malaysia (CMS)             | MN746909                 | -          | -           |
|         | May571    | -           | Selangor, Malaysia (CMS)             | MN746910                 | -          | -           |
|         | May572    | -           | Selangor, Malaysia (CMS)             | MN746911                 | -          | -           |
|         | May573    | -           | Selangor, Malaysia (CMS)             | MN746912                 | -          | -           |
|         | May574    | -           | Selangor, Malaysia (CMS)             | MN746913                 | -          | -           |
|         | May578    | -           | Selangor, Malaysia (CMS)             | MN746917                 | -          | -           |
|         | May419    | -           | Selangor, Malaysia (CMS)             | MN746884                 | -          | -           |
|         | May421    | -           | Selangor, Malaysia (CMS)             | MN746886                 | -          | -           |
|         | May422    | -           | Selangor, Malaysia (CMS)             | MN746887                 | -          | -           |
|         | May423    | -           | Selangor, Malaysia (CMS)             | MN746888                 | -          | -           |
|         | May425    | -           | Selangor, Malaysia (CMS)             | MN746889                 | -          | -           |
|         | May426    | -           | Selangor, Malaysia (CMS)             | MN746890                 | -          | -           |
|         | May427    | -           | Selangor, Malaysia (CMS)             | MN746891                 | -          | -           |

| Species | Sample ID | Voucher No. | Sample site                               | GenBank Accession Number |            |             |
|---------|-----------|-------------|-------------------------------------------|--------------------------|------------|-------------|
|         |           |             |                                           | <i>Cyt b</i>             | <i>COI</i> | <i>RAG1</i> |
|         | May428    | -           | Selangor, Malaysia (CMS)                  | MN746892                 | -          | -           |
|         | May430    | -           | Selangor, Malaysia (CMS)                  | MN746894                 | -          | -           |
|         | May432    | -           | Selangor, Malaysia (CMS)                  | MN746896                 | -          | -           |
|         | May433    | -           | Selangor, Malaysia (CMS)                  | MN746897                 | -          | -           |
|         | May197    | -           | Kota Bharu, Kelantan, Malaysia (EPM)      | MN746870                 | -          | -           |
|         | May198    | -           | Kota Bharu, Kelantan, Malaysia (EPM)      | MN746871                 | -          | -           |
|         | May199    | -           | Kota Bharu, Kelantan, Malaysia (EPM)      | MN746872                 | -          | -           |
|         | May200    | -           | Kota Bharu, Kelantan, Malaysia (EPM)      | MN746873                 | -          | -           |
|         | May201    | -           | Kota Bharu, Kelantan, Malaysia (EPM)      | MN746874                 | -          | -           |
|         | May202    | -           | Kota Bharu, Kelantan, Malaysia (EPM)      | MN746875                 | MT778778   | MT778782    |
|         | May203    | -           | Kota Bharu, Kelantan, Malaysia (EPM)      | MN746876                 | -          | -           |
|         | May204    | -           | Kota Bharu, Kelantan, Malaysia (EPM)      | MN746877                 | -          | -           |
|         | May205    | -           | Kota Bharu, Kelantan, Malaysia (EPM)      | MN746878                 | -          | -           |
|         | May206    | -           | Kota Bharu, Kelantan, Malaysia (EPM)      | MN746879                 | -          | -           |
|         | May207    | -           | Kota Bharu, Kelantan, Malaysia (EPM)      | MN746880                 | -          | -           |
|         | May208    | -           | Kota Bharu, Kelantan, Malaysia (EPM)      | MN746881                 | -          | -           |
|         | May209    | -           | Kota Bharu, Kelantan, Malaysia (EPM)      | MN746882                 | -          | -           |
|         | May487    | -           | Pualu Kambing, Terangganu, Malaysia (EPM) | MN746900                 | -          | -           |
|         | May488    | -           | Pualu Kambing, Terangganu, Malaysia (EPM) | MN746901                 | -          | -           |
|         | May489    | -           | Pualu Kambing, Terangganu, Malaysia (EPM) | MN746902                 | -          | -           |
|         | May490    | -           | Pualu Kambing, Terangganu, Malaysia (EPM) | MN746903                 | -          | -           |
|         | May491    | -           | Pualu Kambing, Terangganu, Malaysia (EPM) | MN746904                 | -          | -           |
|         | May492    | -           | Pualu Kambing, Terangganu, Malaysia (EPM) | MN746905                 | -          | -           |
|         | May493    | -           | Pualu Kambing, Terangganu, Malaysia (EPM) | MN746906                 | -          | -           |
|         | WJC7565   | -           | Klong wan, Thailand (GoT)                 | MN746942                 | -          | -           |
|         | WJC7566   | -           | Klong wan, Thailand (GoT)                 | MN746943                 | -          | -           |
|         | WJC7567   | -           | Klong wan, Thailand (GoT)                 | MN746944                 | -          | -           |
|         | WJC7568   | -           | Klong wan, Thailand (GoT)                 | MN746945                 | -          | -           |
|         | WJC7569   | -           | Klong wan, Thailand (GoT)                 | MN746946                 | -          | -           |
|         | WJC7570   | -           | Klong wan, Thailand (GoT)                 | MN746947                 | -          | -           |

| Species | Sample ID | Voucher No. | Sample site                  | GenBank Accession Number |            |             |
|---------|-----------|-------------|------------------------------|--------------------------|------------|-------------|
|         |           |             |                              | <i>Cyt b</i>             | <i>COI</i> | <i>RAG1</i> |
|         | WJC7571   | -           | Klong wan, Thailand (GoT)    | MN746948                 | -          | -           |
|         | WJC7572   | -           | Klong wan, Thailand (GoT)    | MN746949                 | -          | -           |
|         | WJC7573   | -           | Klong wan, Thailand (GoT)    | MN746950                 | -          | -           |
|         | WJC7574   | -           | Klong wan, Thailand (GoT)    | MN746951                 | -          | -           |
|         | WJC7713   | -           | Pran Buri, Thailand (GoT)    | MN746967                 | -          | -           |
|         | WJC7714   | -           | Pran Buri, Thailand (GoT)    | MN746968                 | -          | -           |
|         | WJC1750   | NTUM11610   | QuangYen Town, Vietnam (HAI) | MN746922                 | KX778050   | KX777829    |
|         | WJC1763   | -           | Hainan, China (HAI)          | MN746923                 | KX778051   | KX777830    |
|         | WJC1784   | NTUM11623   | Hainan, China (HAI)          | MN746924                 | KX778052   | KX777831    |
|         | WJC4753   | -           | Hainan, China (HAI)          | MN746941                 | -          | -           |
|         | WJC1811   | -           | Hainan, China (HAI)          | MN746925                 | -          | -           |
|         | WJC4598   | NTUM11717   | Hainan, China (HAI)          | MN746926                 | -          | -           |
|         | WJC4599   | -           | Hainan, China (HAI)          | MN746927                 | -          | -           |
|         | WJC4600   | -           | Hainan, China (HAI)          | MN746928                 | -          | -           |
|         | WJC4601   | -           | Hainan, China (HAI)          | MN746929                 | -          | -           |
|         | WJC4602   | -           | Hainan, China (HAI)          | MN746930                 | -          | -           |
|         | WJC4603   | NTUM11719   | Hainan, China (HAI)          | MN746931                 | -          | -           |
|         | WJC4604   | -           | Hainan, China (HAI)          | MN746932                 | -          | -           |
|         | WJC4605   | -           | Hainan, China (HAI)          | MN746933                 | -          | -           |
|         | WJC4606   | -           | Hainan, China (HAI)          | MN746934                 | -          | -           |
|         | WJC4607   | -           | Hainan, China (HAI)          | MN746935                 | -          | -           |
|         | WJC4608   | -           | Hainan, China (HAI)          | MN746936                 | -          | -           |
|         | WJC4609   | -           | Hainan, China (HAI)          | MN746937                 | -          | -           |
|         | WJC4610   | -           | Hainan, China (HAI)          | MN746938                 | -          | -           |
|         | WJC4648   | -           | Hainan, China (HAI)          | MN746939                 | -          | -           |
|         | WJC4649   | -           | Hainan, China (HAI)          | MN746940                 | -          | -           |
|         | WJC1939   | -           | Pulau Ubin, Singapore        | MT778784                 | KX778053   | KX777832    |
|         | WJC1956   | NTUM11644   | Wuchi, Taiwan (TWS)          | MT778785                 | -          | -           |
|         | WJC2595   | NTUM11685   | Wuchi, Taiwan (TWS)          | MT778786                 | -          | -           |
|         | WJC2596   | NTUM11685   | Wuchi, Taiwan (TWS)          | MT778787                 | -          | -           |

| Species                 | Sample ID | Voucher No. | Sample site                               | GenBank Accession Number |            |             |
|-------------------------|-----------|-------------|-------------------------------------------|--------------------------|------------|-------------|
|                         |           |             |                                           | <i>Cyt b</i>             | <i>COI</i> | <i>RAG1</i> |
|                         | WJC2597   | NTUM11685   | Wuchi, Taiwan (TWS)                       | MT778788                 | KX778054   | KX777833    |
|                         | WJC3506   | NTUM11704   | Wuchi, Taiwan (TWS)                       | MT778789                 | -          | -           |
|                         | WJC5285   | NTUM11732   | Kota Kinabalu, Sabah, Malaysia            | MT778790                 | KX778055   | KX777834    |
|                         | WJC5573   | -           | Tawau, Sabah, Malaysia                    | MT778791                 | -          | -           |
|                         | WJC5574   | -           | Tawau, Sabah, Malaysia                    | MT778792                 | -          | -           |
| <i>P. argentata</i>     | CN172     | -           | Penghu, Taiwan                            | KP722669                 | KP722758   | KP722941    |
|                         | CN258     | -           | Longkou port, Shandong, China             | MT778793                 | KX778057   | KX777836    |
|                         | CN299     | -           | HK Aberdeen Fish Market, Hong Kong        | MT778794                 | KX778058   | KX777837    |
|                         | CN592     | -           | Xiamen, China                             | MT778795                 | KX778059   | KX777838    |
|                         | WJC0880   | NTUM11551   | Wuchi, Taiwan                             | MT778796                 | KX778061   | KX777840    |
|                         | WJC0984   | NTUM11560   | Jagalchi, Korea                           | MT778797                 | KX778062   | KX777841    |
|                         | WJC6398   | -           | Off Hirono, Fukushima, Japan              | MT778798                 | KX778069   | KX777848    |
|                         | WJC6439   | NTUM11740   | Tokyo Bay, Japan                          | MT778799                 | KX778070   | KX777849    |
| <i>P. macrocephalus</i> | May185    | -           | Kota Bharu, Kelantan, Malaysia (EPM)      | MT778664                 | -          | -           |
|                         | May186    | -           | Kota Bharu, Kelantan, Malaysia (EPM)      | MT778665                 | KX778073   | KX777852    |
|                         | May447    | -           | Pualu Kambing, Terangganu, Malaysia (EPM) | MT778666                 | KX778074   | KX777853    |
|                         | May448    | -           | Pualu Kambing, Terangganu, Malaysia (EPM) | MT778667                 | -          | -           |
|                         | May449    | -           | Pualu Kambing, Terangganu, Malaysia (EPM) | MT778668                 | -          | -           |
|                         | May450    | -           | Pualu Kambing, Terangganu, Malaysia (EPM) | MT778669                 | -          | -           |
|                         | May451    | -           | Pualu Kambing, Terangganu, Malaysia (EPM) | MT778670                 | -          | -           |
|                         | May452    | -           | Pualu Kambing, Terangganu, Malaysia (EPM) | MT778671                 | -          | -           |
|                         | May453    | -           | Pualu Kambing, Terangganu, Malaysia (EPM) | MT778672                 | -          | -           |
|                         | May454    | -           | Pualu Kambing, Terangganu, Malaysia (EPM) | MT778673                 | -          | -           |
|                         | WJC1786   | NTUM11625   | Hainan, China (HAI)                       | MT778674                 | KX778080   | KX777859    |
|                         | WJC1796   | NTUM11628   | Hainan, China (HAI)                       | MT778675                 | -          | -           |
|                         | WJC4754   | NTUM11726   | Hainan, China (HAI)                       | MT778676                 | -          | -           |
|                         | WJC4755   | -           | Hainan, China (HAI)                       | MT778677                 | -          | -           |
|                         | WJC4756   | -           | Hainan, China (HAI)                       | MT778678                 | -          | -           |

| Species | Sample ID | Voucher No. | Sample site           | GenBank Accession Number |            |             |
|---------|-----------|-------------|-----------------------|--------------------------|------------|-------------|
|         |           |             |                       | <i>Cyt b</i>             | <i>COI</i> | <i>RAG1</i> |
|         | WJC4757   | -           | Hainan, China (HAI)   | MT778679                 | -          | -           |
|         | WJC4758   | -           | Hainan, China (HAI)   | MT778680                 | -          | -           |
|         | WJC4759   | -           | Hainan, China (HAI)   | MT778681                 | -          | -           |
|         | WJC4760   | -           | Hainan, China (HAI)   | MT778682                 | -          | -           |
|         | WJC4761   | -           | Hainan, China (HAI)   | MT778683                 | -          | -           |
|         | WJC4762   | -           | Hainan, China (HAI)   | MT778684                 | -          | -           |
|         | WJC4763   | -           | Hainan, China (HAI)   | MT778685                 | -          | -           |
|         | WJC4764   | -           | Hainan, China (HAI)   | MT778686                 | -          | -           |
|         | WJC4765   | -           | Hainan, China (HAI)   | MT778687                 | -          | -           |
|         | WJC0918   | NTUM11554   | Ilan, Taiwan (ETW)    | MT778688                 | KX778079   | KX777858    |
|         | WJC0919   | NTUM11554   | Ilan, Taiwan (ETW)    | MT778689                 | -          | -           |
|         | WJC0920   | NTUM11554   | Ilan, Taiwan (ETW)    | MT778690                 | -          | -           |
|         | WJC0921   | NTUM11554   | Ilan, Taiwan (ETW)    | MT778691                 | -          | -           |
|         | WJC4882   | NTUM11727   | Ilan, Taiwan (ETW)    | MT778692                 | -          | -           |
|         | WJC4883   | NTUM11727   | Ilan, Taiwan (ETW)    | MT778693                 | -          | -           |
|         | WJC4884   | NTUM11727   | Ilan, Taiwan (ETW)    | MT778694                 | -          | -           |
|         | WJC4885   | NTUM11727   | Ilan, Taiwan (ETW)    | MT778695                 | -          | -           |
|         | WJC4886   | NTUM11727   | Ilan, Taiwan (ETW)    | MT778696                 | -          | -           |
|         | WJC4887   | NTUM11727   | Ilan, Taiwan (ETW)    | MT778697                 | -          | -           |
|         | WJC4888   | NTUM11727   | Ilan, Taiwan (ETW)    | MT778698                 | -          | -           |
|         | WJC4889   | NTUM11727   | Ilan, Taiwan (ETW)    | MT778699                 | -          | -           |
|         | WJC4890   | NTUM11727   | Ilan, Taiwan (ETW)    | MT778700                 | -          | -           |
|         | WJC4891   | NTUM11727   | Ilan, Taiwan (ETW)    | MT778701                 | -          | -           |
|         | WJC4558   | NTUM11707   | Taitung, Taiwan (ETW) | MT778702                 | KX778081   | KX777860    |
|         | WJC4559   | NTUM11707   | Taitung, Taiwan (ETW) | MT778703                 | -          | -           |
|         | WJC4560   | NTUM11707   | Taitung, Taiwan (ETW) | MT778704                 | -          | -           |
|         | WJC4561   | NTUM11707   | Taitung, Taiwan (ETW) | MT778705                 | -          | -           |
|         | WJC4562   | NTUM11707   | Taitung, Taiwan (ETW) | MT778706                 | -          | -           |
|         | WJC4563   | NTUM11707   | Taitung, Taiwan (ETW) | MT778707                 | -          | -           |
|         | WJC4564   | NTUM11707   | Taitung, Taiwan (ETW) | MT778708                 | -          | -           |



| Species | Sample ID | Voucher No. | Sample site           | GenBank Accession Number |            |             |
|---------|-----------|-------------|-----------------------|--------------------------|------------|-------------|
|         |           |             |                       | <i>Cyt b</i>             | <i>COI</i> | <i>RAG1</i> |
|         | WJC4565   | NTUM11707   | Taitung, Taiwan (ETW) | MT778709                 | -          | -           |
|         | WJC0666   | NTUM11527   | Wuchi, Taiwan (TWS)   | MT778710                 | -          | -           |
|         | WJC0674   | NTUM11527   | Wuchi, Taiwan (TWS)   | MT778711                 | -          | -           |
|         | WJC0679   | NTUM11536   | Wuchi, Taiwan (TWS)   | MT778712                 | KX778077   | KX777856    |
|         | WJC0680   | NTUM11536   | Wuchi, Taiwan (TWS)   | MT778713                 | -          | -           |
|         | WJC0687   | NTUM11527   | Wuchi, Taiwan (TWS)   | MT778714                 | -          | -           |
|         | WJC0728   | NTUM11542   | Wuchi, Taiwan (TWS)   | MT778715                 | -          | -           |
|         | WJC0729   | NTUM11542   | Wuchi, Taiwan (TWS)   | MT778716                 | -          | -           |
|         | WJC0882   | NTUM11552   | Wuchi, Taiwan (TWS)   | MT778717                 | -          | -           |
|         | WJC0883   | NTUM11552   | Wuchi, Taiwan (TWS)   | MT778718                 | -          | -           |
|         | WJC1035   | NTUM11567   | Wuchi, Taiwan (TWS)   | MT778719                 | -          | -           |
|         | WJC1036   | NTUM11567   | Wuchi, Taiwan (TWS)   | MT778720                 | -          | -           |
|         | WJC1072   | NTUM11571   | Wuchi, Taiwan (TWS)   | MT778721                 | -          | -           |
|         | WJC1073   | NTUM11571   | Wuchi, Taiwan (TWS)   | MT778722                 | -          | -           |
|         | WJC2136   | NTUM11678   | Wuchi, Taiwan (TWS)   | MT778723                 | -          | -           |
|         | WJC2137   | NTUM11678   | Wuchi, Taiwan (TWS)   | MT778724                 | -          | -           |
|         | WJC1112   | -           | Yunlin, Taiwan (TWS)  | MT778725                 | -          | -           |
|         | WJC5087   | NTUM11729   | Penghu, Taiwan (TWS)  | MT778726                 | -          | -           |
|         | WJC5088   | NTUM11729   | Penghu, Taiwan (TWS)  | MT778727                 | KX778082   | KX777861    |
|         | WJC5089   | NTUM11729   | Penghu, Taiwan (TWS)  | MT778728                 | -          | -           |
|         | WJC5090   | NTUM11729   | Penghu, Taiwan (TWS)  | MT778729                 | -          | -           |
|         | WJC5091   | NTUM11729   | Penghu, Taiwan (TWS)  | MT778730                 | -          | -           |
|         | WJC5092   | NTUM11729   | Penghu, Taiwan (TWS)  | MT778731                 | -          | -           |
|         | WJC5093   | NTUM11729   | Penghu, Taiwan (TWS)  | MT778732                 | -          | -           |
|         | WJC5094   | NTUM11729   | Penghu, Taiwan (TWS)  | MT778733                 | -          | -           |
|         | WJC5095   | NTUM11729   | Penghu, Taiwan (TWS)  | MT778734                 | -          | -           |
|         | WJC5096   | -           | Penghu, Taiwan (TWS)  | MT778735                 | -          | -           |
|         | WJC5098   | -           | Penghu, Taiwan (TWS)  | MT778736                 | -          | -           |
|         | WJC5099   | -           | Penghu, Taiwan (TWS)  | MT778737                 | -          | -           |
|         | WJC5100   | -           | Penghu, Taiwan (TWS)  | MT778738                 | -          | -           |

| Species | Sample ID | Voucher No. | Sample site            | GenBank Accession Number |            |             |
|---------|-----------|-------------|------------------------|--------------------------|------------|-------------|
|         |           |             |                        | <i>Cyt b</i>             | <i>COI</i> | <i>RAG1</i> |
|         | WJC5101   | -           | Penghu, Taiwan (TWS)   | MT778739                 | -          | -           |
|         | WJC5102   | -           | Penghu, Taiwan (TWS)   | MT778740                 | -          | -           |
|         | WJC5103   | -           | Penghu, Taiwan (TWS)   | MT778741                 | -          | -           |
|         | WJC5104   | -           | Penghu, Taiwan (TWS)   | MT778742                 | -          | -           |
|         | WJC5138   | NTUM11747   | Penghu, Taiwan (TWS)   | MT778743                 | -          | -           |
|         | WJC5139   | NTUM11747   | Penghu, Taiwan (TWS)   | MT778744                 | -          | -           |
|         | WJC0427   | -           | Chaiyi, Taiwan (TWS)   | MT778745                 | -          | -           |
|         | WJC0658   | NTUM11523   | Chaiyi, Taiwan (TWS)   | MT778746                 | -          | -           |
|         | WJC0659   | NTUM11523   | Chaiyi, Taiwan (TWS)   | MT778747                 | -          | -           |
|         | WJC0488   | NTUM11515   | Chaiyi, Taiwan (TWS)   | MT778748                 | KX778076   | KX777855    |
|         | WJC0491   | -           | Chaiyi, Taiwan (TWS)   | MT778749                 | -          | -           |
|         | WJC0651   | NTUM11521   | Chaiyi, Taiwan (TWS)   | MT778750                 | -          | -           |
|         | WJC0652   | NTUM11521   | Chaiyi, Taiwan (TWS)   | MT778751                 | -          | -           |
|         | WJC0483   | NTUM11511   | Anping, Taiwan (TWS)   | MT778752                 | KX778075   | KX777854    |
|         | WJC1567   | NTUM11587   | Anping, Taiwan (TWS)   | MT778753                 | -          | -           |
|         | WJC1568   | NTUM11587   | Anping, Taiwan (TWS)   | MT778754                 | -          | -           |
|         | WJC1569   | NTUM11587   | Anping, Taiwan (TWS)   | MT778755                 | -          | -           |
|         | WJC3531   | -           | Pingtung, Taiwan (TWS) | MT778756                 | -          | -           |
|         | WJC3532   | -           | Pingtung, Taiwan (TWS) | MT778757                 | -          | -           |
|         | WJC3533   | -           | Pingtung, Taiwan (TWS) | MT778758                 | -          | -           |
|         | WJC3534   | -           | Pingtung, Taiwan (TWS) | MT778759                 | -          | -           |
|         | WJC3535   | -           | Pingtung, Taiwan (TWS) | MT778760                 | -          | -           |
|         | WJC3536   | -           | Pingtung, Taiwan (TWS) | MT778761                 | -          | -           |
|         | WJC3537   | -           | Pingtung, Taiwan (TWS) | MT778762                 | -          | -           |
|         | WJC3538   | -           | Pingtung, Taiwan (TWS) | MT778763                 | -          | -           |
|         | WJC3539   | -           | Pingtung, Taiwan (TWS) | MT778764                 | -          | -           |
|         | WJC3540   | -           | Pingtung, Taiwan (TWS) | MT778765                 | -          | -           |
|         | WJC3541   | -           | Pingtung, Taiwan (TWS) | MT778766                 | -          | -           |
|         | WJC3542   | -           | Pingtung, Taiwan (TWS) | MT778767                 | -          | -           |
|         | CN640     | -           | Pingtung, Taiwan (TWS) | MT778768                 | -          | -           |

| Species         | Sample ID | Voucher No. | Sample site                              | GenBank Accession Number |            |             |
|-----------------|-----------|-------------|------------------------------------------|--------------------------|------------|-------------|
|                 |           |             |                                          | <i>Cyt b</i>             | <i>COI</i> | <i>RAG1</i> |
|                 | CN641     | -           | Pingtung, Taiwan (TWS)                   | MT778769                 | -          | -           |
|                 | CN642     | -           | Pingtung, Taiwan (TWS)                   | MT778770                 | -          | -           |
|                 | CN643     | -           | Pingtung, Taiwan (TWS)                   | MT778771                 | -          | -           |
|                 | WJC1643   | NTUM11602   | Pingtung, Taiwan (TWS)                   | MT778772                 | -          | -           |
|                 | WJC1644   | NTUM11602   | Pingtung, Taiwan (TWS)                   | MT778773                 | -          | -           |
|                 | WJC1645   | NTUM11602   | Pingtung, Taiwan (TWS)                   | MT778774                 | -          | -           |
|                 |           |             |                                          |                          |            |             |
| <i>P. ovata</i> | WJC8498   | -           | Riaz Uddin, Chittagong, Bangladesh (BoB) | MN841741                 | -          | -           |
|                 | WJC8499   | -           | Riaz Uddin, Chittagong, Bangladesh (BoB) | MN841742                 | -          | -           |
|                 | WJC8500   | -           | Riaz Uddin, Chittagong, Bangladesh (BoB) | MN841743                 | -          | MT778783    |
|                 | WJC8502   | -           | Riaz Uddin, Chittagong, Bangladesh (BoB) | MN841744                 | -          | -           |
|                 | WJC8503   | -           | Riaz Uddin, Chittagong, Bangladesh (BoB) | MN841745                 | -          | -           |
|                 | WJC8504   | -           | Riaz Uddin, Chittagong, Bangladesh (BoB) | MN841746                 | -          | -           |
|                 | WJC8505   | -           | Riaz Uddin, Chittagong, Bangladesh (BoB) | MN841747                 | -          | -           |
|                 | WJC8506   | -           | Riaz Uddin, Chittagong, Bangladesh (BoB) | MN841748                 | -          | -           |
|                 | WJC8507   | -           | Riaz Uddin, Chittagong, Bangladesh (BoB) | MN841749                 | -          | -           |
|                 | WJC8509   | -           | Riaz Uddin, Chittagong, Bangladesh (BoB) | MN841750                 | -          | -           |
|                 | WJC8510   | -           | Riaz Uddin, Chittagong, Bangladesh (BoB) | MN841751                 | -          | -           |
|                 | WJC8511   | -           | Riaz Uddin, Chittagong, Bangladesh (BoB) | MN841752                 | -          | -           |
|                 | May067    | -           | Kuala Perlis, Perlis, Malaysia (NMS)     | MN841701                 | -          | -           |
|                 | May068    | -           | Kuala Perlis, Perlis, Malaysia (NMS)     | MN841702                 | -          | -           |
|                 | May069    | -           | Kuala Perlis, Perlis, Malaysia (NMS)     | MN841703                 | -          | -           |
|                 | May071    | -           | Kuala Perlis, Perlis, Malaysia (NMS)     | MN841704                 | -          | -           |
|                 | May072    | -           | Kuala Perlis, Perlis, Malaysia (NMS)     | MN841705                 | -          | -           |
|                 | May073    | -           | Kuala Perlis, Perlis, Malaysia (NMS)     | MN841706                 | -          | -           |
|                 | May074    | -           | Kuala Perlis, Perlis, Malaysia (NMS)     | MN841707                 | -          | -           |
|                 | May075    | -           | Kuala Perlis, Perlis, Malaysia (NMS)     | MN841708                 | -          | -           |
|                 | May076    | -           | Kuala Perlis, Perlis, Malaysia (NMS)     | MN841709                 | KX778085   | KX777864    |
|                 | May165    | -           | Kuala Perlis, Perlis, Malaysia (NMS)     | MN841712                 | -          | -           |
|                 | May682    | -           | Kuala Perlis, Perlis, Malaysia (NMS)     | MN841735                 | -          | -           |

| Species | Sample ID | Voucher No. | Sample site                          | GenBank Accession Number |            |             |
|---------|-----------|-------------|--------------------------------------|--------------------------|------------|-------------|
|         |           |             |                                      | <i>Cyt b</i>             | <i>COI</i> | <i>RAG1</i> |
|         | May683    | -           | Kuala Perlis, Perlis, Malaysia (NMS) | MN841736                 | -          | -           |
|         | May684    | -           | Kuala Perlis, Perlis, Malaysia (NMS) | MN841737                 | -          | -           |
|         | May685    | -           | Kuala Perlis, Perlis, Malaysia (NMS) | MN841738                 | -          | -           |
|         | CN239     | -           | Penang, Malaysia (NMS)               | MN841700                 | KX778084   | KX777863    |
|         | May791    | -           | Penang, Malaysia (NMS)               | MN841739                 | -          | -           |
|         | May793    | -           | Penang, Malaysia (NMS)               | MN841740                 | -          | -           |
|         | May106    | -           | Lumut, Perak, Malaysia (NMS)         | MN841710                 | KX778086   | KX777865    |
|         | May107    | -           | Lumut, Perak, Malaysia (NMS)         | MN841711                 | -          | -           |
|         | May605    | -           | Bagan Panchor, Perak, Malaysia (NMS) | MN841713                 | -          | -           |
|         | May606    | -           | Bagan Panchor, Perak, Malaysia (NMS) | MN841714                 | -          | -           |
|         | May607    | -           | Bagan Panchor, Perak, Malaysia (NMS) | MN841715                 | -          | -           |
|         | May608    | -           | Bagan Panchor, Perak, Malaysia (NMS) | MN841716                 | -          | -           |
|         | May609    | -           | Bagan Panchor, Perak, Malaysia (NMS) | MN841717                 | -          | -           |
|         | May611    | -           | Bagan Panchor, Perak, Malaysia (NMS) | MN841718                 | -          | -           |
|         | May613    | -           | Bagan Panchor, Perak, Malaysia (NMS) | MN841719                 | -          | -           |
|         | May615    | -           | Bagan Panchor, Perak, Malaysia (NMS) | MN841720                 | -          | -           |
|         | May617    | -           | Bagan Panchor, Perak, Malaysia (NMS) | MN841721                 | -          | -           |
|         | May618    | -           | Bagan Panchor, Perak, Malaysia (NMS) | MN841722                 | -          | -           |
|         | May620    | -           | Bagan Panchor, Perak, Malaysia (NMS) | MN841723                 | -          | -           |
|         | May621    | -           | Bagan Panchor, Perak, Malaysia (NMS) | MN841724                 | -          | -           |
|         | May622    | -           | Bagan Panchor, Perak, Malaysia (NMS) | MN841725                 | -          | -           |
|         | May624    | -           | Bagan Panchor, Perak, Malaysia (NMS) | MN841726                 | -          | -           |
|         | May626    | -           | Bagan Panchor, Perak, Malaysia (NMS) | MN841727                 | -          | -           |
|         | May627    | -           | Bagan Panchor, Perak, Malaysia (NMS) | MN841728                 | -          | -           |
|         | May628    | -           | Bagan Panchor, Perak, Malaysia (NMS) | MN841729                 | -          | -           |
|         | May629    | -           | Bagan Panchor, Perak, Malaysia (NMS) | MN841730                 | -          | -           |
|         | May630    | -           | Bagan Panchor, Perak, Malaysia (NMS) | MN841731                 | -          | -           |
|         | May631    | -           | Bagan Panchor, Perak, Malaysia (NMS) | MN841732                 | -          | -           |
|         | May632    | -           | Bagan Panchor, Perak, Malaysia (NMS) | MN841733                 | -          | -           |
|         | May633    | -           | Bagan Panchor, Perak, Malaysia (NMS) | MN841734                 | -          | -           |

| Species                    | Sample ID | Voucher No. | Sample site                    | GenBank Accession Number |            |             |
|----------------------------|-----------|-------------|--------------------------------|--------------------------|------------|-------------|
|                            |           |             |                                | <i>Cyt b</i>             | <i>COI</i> | <i>RAG1</i> |
| <i>P. pawak</i>            | May187    | -           | Kota Bharu, Kelantan, Malaysia | MT778800                 | KX778087   | KX777866    |
|                            | WJC1753   | NTUM11612   | VanDon Town, Vietnam           | MT778801                 | KX778089   | KX777868    |
|                            | WJC0448   | NTUM11507   | Anping, Taiwan                 | KP722671                 | -          | -           |
|                            | WJC1748   | NTUM11608   | HaLong, Vietnam                | MT778802                 | -          | -           |
| <i>Chrysochir aureus</i> * | WJC0451   | NTUM11510   |                                | KP722617                 | KP722708   | KP722892    |
| <i>Megalonibea fusca</i> * | WJC1818   | -           |                                | KP722646                 | KP722735   | KP722922    |

\*Out-group

Table S3. Representative for each *Pennahia* species used in estimating the divergence time with their assigned ocean region. In parenthesis is the sampling location.

| Species                 | Sample ID                         | EIO | Region |     |     |
|-------------------------|-----------------------------------|-----|--------|-----|-----|
|                         |                                   |     | SCS    | ECS | NWP |
| <i>P. anea</i> L1       | WJC7651(Ranong, Thailand)         | +   |        |     |     |
|                         | MAY133 (Kuala Perlis, Malaysia)   | +   |        |     |     |
|                         | MAY580 (Selangor, Malaysia)       | +   |        |     |     |
| <i>P. anea</i> L2       | MAY126 (Kuala Perlis, Malaysia)   | +   |        |     |     |
|                         | MAY105 (Lumut, Malaysia)          | +   |        |     |     |
|                         | MAY202 (Kota Bharu, Malaysia)     |     | +      |     |     |
|                         | WJC1763 (Hainan, China)           |     | +      |     |     |
|                         | WJC5285 (Kota Kinabalu, Malaysia) |     | +      |     |     |
|                         | WJC2597 (Wuchi, Taiwan)           |     | +      |     |     |
| <i>P. argentata</i>     | CN172 (Penghu, Taiwan)            |     | +      |     |     |
|                         | CN299 (Hong Kong, China)          |     | +      |     |     |
|                         | WJC0984 (Jagalchi, Korea)         |     |        | +   |     |
|                         | WJC6398 (Fukushima, Japan)        |     |        |     | +   |
|                         | WJC6439 (Tokyo, Japan)            |     |        |     | +   |
| <i>P. macrocephalus</i> | MAY447 (Pulau Kambing, Malaysia)  |     | +      |     |     |
|                         | WJC1786 (Hainan, China)           |     | +      |     |     |
|                         | WJC0679 (Wuchi, Taiwan)           |     | +      |     |     |
|                         | CN640 (Pingtung, Taiwan)          |     | +      |     |     |
|                         | WJC0918 (Ilan, Taiwan)            |     | +      |     |     |
| <i>P. ovata</i>         | WJC8500 (Chittagong, Bangladesh)  | +   |        |     |     |
|                         | MAY106 (Lumut, Malaysia)          | +   |        |     |     |
| <i>P. pawak</i>         | MAY187 (Kota Bharu, Malaysia)     |     | +      |     |     |
|                         | WJC1753 (VanDon, Vietnam)         |     | +      |     |     |

EIO: East Indian Ocean; SCS: South China Sea; ECS: East China Sea; NWP: northwestern Pacific (Japan)

Table S4. Primers used to amplify *cytb*, *COI* and *RAG1* genes of *Pennahia* species in this study.

| <b>Locus</b> | <b>Primer name</b> | <b>Primer sequence (5'-3')</b>  | <b>Source</b>      |
|--------------|--------------------|---------------------------------|--------------------|
| <i>cytb</i>  | Pennah 14771F      | F: CTAACCACGCACTAGTGGACCT       | This study         |
|              | MT 14673F          | F: TAACCAGGACTAATGGCTTGAAA      | Borsa et al., 2013 |
|              | Perco 15053F       | F: TACAAAGAAACMTGAAACATYGGAGT   | Chen, unpubl.      |
|              | Sciae 15851R       | R: GGTGCTCTGANRCTGAGCTACTA      | Lo et al., 2015    |
| <i>COI</i>   | CoxI FishF1        | F: TCAACCAACCACAAAGACATTGGCAC   | Ward et al., 2005  |
|              | CoxI FishF2        | F: TCGACTAATCATAAAGATATCGGCAC   | Ward et al., 2005  |
|              | CoxI FishR1        | R: TAGACTTCTGGGTGGCCAAAGAATCA   | Ward et al., 2005  |
|              | CoxI FishR2        | R: ACTTCAGGGTGACCGAAGAATCAGAA   | Ward et al., 2005  |
| <i>RAG1</i>  | R1 2533F           | F: CTGAGCTGCAGTCAGTACCATAAGATGT | López et al., 2004 |
|              | R1 4090R           | R: CTGAGTCCTTGTGAGCTTCCATRAAYTT | López et al., 2004 |
|              | R1 4061R           | R: AATACTTGGAGGTGTAGAGCCAGT     | Chen et al., 2007  |

#### Sources

- Borsa, P., Hsiao, D.R., Carpenter, K.E., Chen, W.J., 2013. Cranial morphometrics and mitochondrial DNA sequences distinguish cryptic species of the longface emperor (*Lethrinus olivaceus*), an emblematic fish of Indo-West Pacific coral reefs. *C. R. Biol.* 336, 505–514.
- Chen, W.J., Ruiz-Carus, R., Ortí, G., 2007. Relationships among four genera of mojarras (Teleostei: Perciformes: Gerreidae) from the western Atlantic and their tentative placement among percomorph fishes. *J. Fish Biol.* 70, 202–218.
- Lo, P.C., Liu, S-H., Chao, N. L., Nunoo, F. K. E., Mok, H.K., Chen, W.J., 2015. A multigene dataset reveals a tropical New World origin and Early Miocene diversification of croakers (Perciformes: Sciaenidae). *Mol. Phylogenet. Evol.* 88, 132–143.
- López, J.A., Chen, W.J., Ortí, G., 2004. Esociform phylogeny. *Copeia* 2004, 449–464.
- Ward, R.D., Zemlak, T.S., Innes, B.H., Last, P.R., Hebert, P.D.N., 2005. DNA barcoding Australia's fish species. *Phil. Trans. R. Soc. B* 360, 1847–1857.

Table S5. Mean genetic  $p$ -distances among populations, and between different lineages and species of *Pennahia* species based on the reconstructed *cytb* tree.

|                                | 1     | 2     | 3     | 4     | 5     | 6     | 7     | 8     | 9     | 10    | 11    | 12    | 13    | 14    | 15    | 16    | 17    | 18    | 19    | 20    | 21    |
|--------------------------------|-------|-------|-------|-------|-------|-------|-------|-------|-------|-------|-------|-------|-------|-------|-------|-------|-------|-------|-------|-------|-------|
| 1 <i>P. anea</i> ADM           |       |       |       |       |       |       |       |       |       |       |       |       |       |       |       |       |       |       |       |       |       |
| 2 <i>P. anea</i> NMS L1        | 0.002 |       |       |       |       |       |       |       |       |       |       |       |       |       |       |       |       |       |       |       |       |
| 3 <i>P. anea</i> CMS L1        | 0.003 | 0.003 |       |       |       |       |       |       |       |       |       |       |       |       |       |       |       |       |       |       |       |
| 4 <i>P. anea</i> NMS L2        | 0.038 | 0.038 | 0.038 |       |       |       |       |       |       |       |       |       |       |       |       |       |       |       |       |       |       |
| 5 <i>P. anea</i> CMS L2        | 0.040 | 0.040 | 0.041 | 0.010 |       |       |       |       |       |       |       |       |       |       |       |       |       |       |       |       |       |
| 6 <i>P. anea</i> EPM           | 0.039 | 0.039 | 0.040 | 0.009 | 0.008 |       |       |       |       |       |       |       |       |       |       |       |       |       |       |       |       |
| 7 <i>P. anea</i> GoT           | 0.040 | 0.040 | 0.040 | 0.009 | 0.008 | 0.007 |       |       |       |       |       |       |       |       |       |       |       |       |       |       |       |
| 8 <i>P. anea</i> HAI           | 0.039 | 0.040 | 0.040 | 0.008 | 0.006 | 0.005 | 0.005 |       |       |       |       |       |       |       |       |       |       |       |       |       |       |
| 9 <i>P. anea</i> TWS           | 0.039 | 0.040 | 0.040 | 0.008 | 0.006 | 0.005 | 0.005 | 0.002 |       |       |       |       |       |       |       |       |       |       |       |       |       |
| 10 <i>P. anea</i> SGP          | 0.039 | 0.039 | 0.039 | 0.009 | 0.008 | 0.006 | 0.007 | 0.003 | 0.003 |       |       |       |       |       |       |       |       |       |       |       |       |
| 11 <i>P. anea</i> SBH          | 0.039 | 0.039 | 0.039 | 0.007 | 0.006 | 0.004 | 0.004 | 0.001 | 0.001 | 0.003 |       |       |       |       |       |       |       |       |       |       |       |
| 12 <i>P. anea</i> CLS          | 0.040 | 0.040 | 0.040 | 0.008 | 0.007 | 0.005 | 0.005 | 0.002 | 0.002 | 0.004 | 0.001 |       |       |       |       |       |       |       |       |       |       |
| 13 <i>P. argentata</i> NWP     | 0.192 | 0.191 | 0.192 | 0.196 | 0.197 | 0.197 | 0.197 | 0.197 | 0.196 | 0.197 | 0.197 | 0.197 |       |       |       |       |       |       |       |       |       |
| 14 <i>P. argentata</i> SCS+ECS | 0.188 | 0.188 | 0.188 | 0.193 | 0.193 | 0.193 | 0.194 | 0.194 | 0.193 | 0.193 | 0.193 | 0.193 | 0.022 |       |       |       |       |       |       |       |       |
| 15 <i>P. macrocephalus</i> EPM | 0.197 | 0.197 | 0.197 | 0.199 | 0.199 | 0.199 | 0.199 | 0.199 | 0.198 | 0.201 | 0.198 | 0.198 | 0.119 | 0.117 |       |       |       |       |       |       |       |
| 16 <i>P. macrocephalus</i> HAI | 0.196 | 0.196 | 0.196 | 0.197 | 0.197 | 0.197 | 0.197 | 0.197 | 0.196 | 0.199 | 0.197 | 0.197 | 0.117 | 0.115 | 0.009 |       |       |       |       |       |       |
| 17 <i>P. macrocephalus</i> TWS | 0.196 | 0.196 | 0.196 | 0.197 | 0.197 | 0.197 | 0.197 | 0.197 | 0.196 | 0.199 | 0.197 | 0.197 | 0.117 | 0.114 | 0.011 | 0.010 |       |       |       |       |       |
| 18 <i>P. macrocephalus</i> ETW | 0.197 | 0.197 | 0.197 | 0.198 | 0.198 | 0.198 | 0.198 | 0.198 | 0.197 | 0.200 | 0.198 | 0.198 | 0.118 | 0.115 | 0.009 | 0.009 | 0.010 |       |       |       |       |
| 19 <i>P. ovata</i> BoB         | 0.164 | 0.164 | 0.164 | 0.160 | 0.161 | 0.162 | 0.161 | 0.163 | 0.162 | 0.165 | 0.162 | 0.162 | 0.174 | 0.174 | 0.166 | 0.166 | 0.166 | 0.167 |       |       |       |
| 20 <i>P. ovata</i> NMS         | 0.165 | 0.165 | 0.165 | 0.161 | 0.163 | 0.164 | 0.163 | 0.165 | 0.164 | 0.164 | 0.164 | 0.163 | 0.175 | 0.175 | 0.168 | 0.168 | 0.168 | 0.169 | 0.017 |       |       |
| 21 <i>P. pawak</i>             | 0.198 | 0.198 | 0.199 | 0.191 | 0.192 | 0.193 | 0.193 | 0.194 | 0.194 | 0.193 | 0.193 | 0.192 | 0.118 | 0.113 | 0.161 | 0.160 | 0.160 | 0.160 | 0.198 | 0.197 |       |
| 22 Outgroup                    | 0.206 | 0.206 | 0.206 | 0.208 | 0.207 | 0.208 | 0.208 | 0.208 | 0.208 | 0.208 | 0.208 | 0.209 | 0.156 | 0.155 | 0.161 | 0.162 | 0.161 | 0.162 | 0.189 | 0.194 | 0.173 |



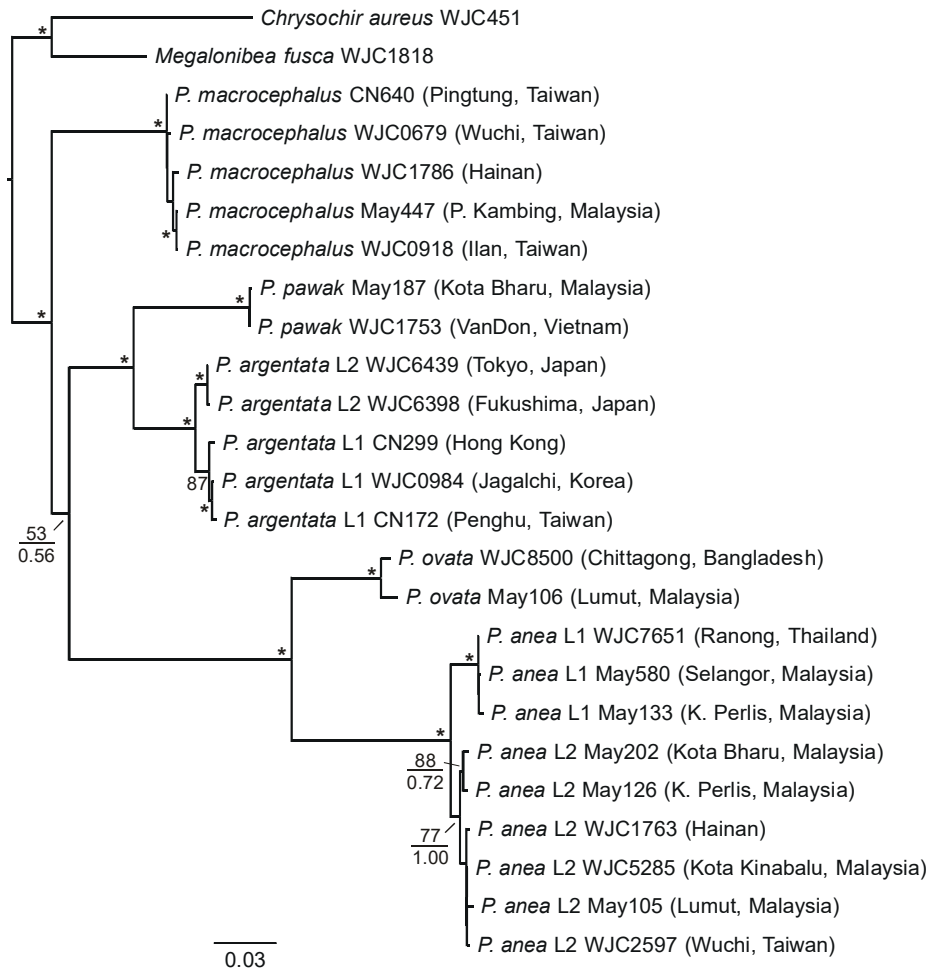

Figure S1. *Pennahia* maximum likelihood phylogenetic tree based on combined (multi-gene) dataset. Branch length is proportional to the inferred number of nucleotide substitutions. Numbers at nodes represent RAXML bootstrap values in percentages and posterior probabilities of BEAST 2 Bayesian inference. Values < 50% or probabilities < 0.50 are not shown. \* indicates bootstrap values  $\geq 95\%$  and posterior probabilities  $\geq 0.95$ . Tree was rooted using *Chrysochir aureus* and *Megalonibea fusca*.
